# Supplementary material for: Multiplex real-time PCR using double-strand primers and probes for the detection of nucleic acids
Source: Royal Society of Chemistry journal article supplement (doi:10.1039/d0ay01661f), 2020-01-01
Supplement: d0ay01661f1.pdf [file d0ay01661f1.pdf]

## Support information

Multiplex real-time PCR using double strand displacing nucleic acids as primers and probes for the detection of nucleic acids

Zhang Zhang <sup>a</sup>, Juan Yao <sup>b</sup>, Xiaolin Huang <sup>b</sup>, Li Zhang <sup>a</sup>, Ting Wang <sup>a</sup>,  
Zhi Weng <sup>a</sup>, Guoming Xie <sup>a\*</sup>

<sup>a</sup> Key Laboratory of Laboratory Medical Diagnostics, Ministry of Education, Department of Laboratory Medicine, Chongqing Medical University, Chongqing, China

<sup>b</sup> Department of Laboratory Medicine, The Affiliated Traditional Chinese Medicine Hospital of Southwest Medical University, Luzhou, China

\* Corresponding author. E-mail: [guomingxie@cqmu.edu.cn](mailto:guomingxie@cqmu.edu.cn)

Table S1 Comparison of different nucleic acid quantification technologies

|                      | SYBR Green | Taqman       | Molecular beacon | Double strand probe |
|----------------------|------------|--------------|------------------|---------------------|
| Specificity          | Medium     | High         | High             | High                |
| Multiplexing         | No         | Yes          | Yes              | Yes                 |
| design               | -          | medium       | difficult        | easy                |
| Fluorescence feature | reversible | unreversible | reversible       | reversible          |

Table S2 Sequences of the designed oligonucleotides

| Name           | Sequences(5'-3')            |
|----------------|-----------------------------|
| ORF1ab-F(FAM)  | 6-FAM-CCCTGTGGGTTTTACTTAA   |
| ORF1ab-F(BHQ1) | TGTAAAACCCACAGGG-BHQ1       |
| ORF1ab-R       | ACGATTGTGCATCAGCTGA         |
| N-F(HEX)       | HEX-GGGGA ACTTCTCCTGCTAGAAT |
| N-F(BHQ1)      | AGCAGGAGAAGTTCCCC-BHQ1      |

|                     |                                |
|---------------------|--------------------------------|
| N-R                 | CAGACATTTTGCTCTCAAGCTG         |
| E_Sarbeco_F(ROX)    | ROX-ACAGGTACGTTAATAGTTAATAGCGT |
| E_Sarbeco_F(Dabcyl) | TTAACTATTAACGTACCTGT-Dabcyl    |
| E_Sarbeco_R         | ATATTGCAGCAGTACGCACACA         |

Table S3 The fraction of SDR primers based melting process at different temperatures. The initial concentration of fluorophore and quencher labeled primers, template were set 200 nM, 300 nM and 1 nM.

|                                          | 57 °C  | 59 °C  | 61 °C  | 63 °C  |
|------------------------------------------|--------|--------|--------|--------|
| ORF1ab-F(FAM)                            | 26 nM  | 45 nM  | 70 nM  | 100 nM |
| ORF1ab-F(BHQ1)                           | 130 nM | 150 nM | 170 nM | 200 nM |
| ORF1ab-F(FAM)/ ORF1ab-F(BHQ1)            | 170 nM | 150 nM | 130 nM | 99 nM  |
| ORF1ab-F(FAM)/template                   | 1 nM   | 1 nM   | 1 nM   | 1 nM   |
| N-F(HEX)                                 | 1nM    | 2.6nM  | 6.3nM  | 14nM   |
| N-F(BHQ1)                                | 100nM  | 100nM  | 110nM  | 120nM  |
| N-F(HEX)/ N-F(BHQ1)                      | 200nM  | 200nM  | 190nM  | 180nM  |
| N-F(HEX)/template                        | 1nM    | 1nM    | 1nM    | 1nM    |
| E_Sarbeco_F(ROX)                         | 11nM   | 26nM   | 51nM   | 85nM   |
| E_Sarbeco_F(Dabcyl)                      | 110nM  | 130nM  | 150nM  | 190nM  |
| E_Sarbeco_F(ROX)/<br>E_Sarbeco_F(Dabcyl) | 190nM  | 170nM  | 150nM  | 110nM  |
| E_Sarbeco_F(ROX)//template               | 1nM    | 1nM    | 1nM    | 1nM    |

Table S4 False signal ratio at different melting temperature. False signal ratio is

defined as the ration of free fluorophore labeled primer to total fluorophore labeled primer

|           | 57 °C | 59 °C | 61 °C | 63 °C |
|-----------|-------|-------|-------|-------|
| ORF1ab-F  | 13%   | 22.5% | 35%   | 50%   |
| N         | 0.5%  | 1.3%  | 3.2%  | 7%    |
| E_Sarbeco | 5.5%  | 13%   | 25.5% | 42.5% |

Fig. S1 RT-PCR results of pseudo virus (A) and RNAs extracted from throat swab sample (B).

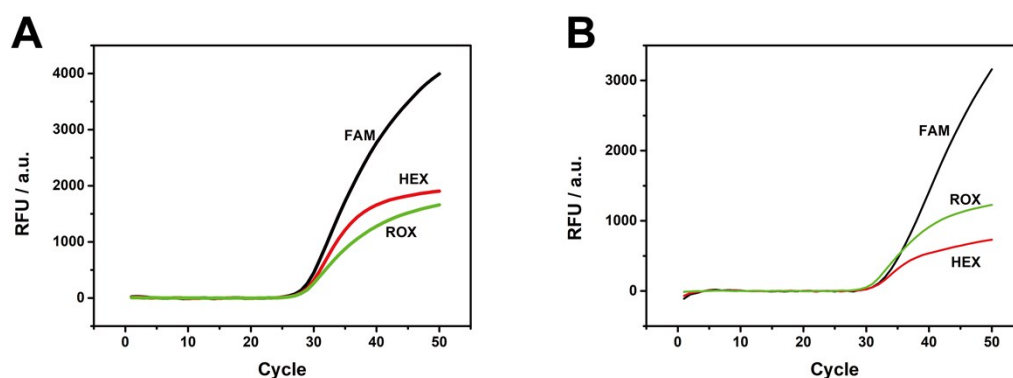

**Positive plasmid sequences for ORF and N gene** (Color font representation amplification products)

TCGCGCGTTTCGGTGATGACGGTGAAAACCTCTGACACATGCAGCTCCCG  
GAGACGGTCACAGCTTGTCTGTAAGCGGATGCCGGGAGCAGACAAGCCC  
GTCAGGGCGCGTCAGCGGGTGTGGCGGGTGTCCGGGCTGGCTTAACTAT  
GCCGCATCAGAGCAGATTGTACTGAGAGTGCACCATATGCCGGTGTGAAAT  
ACCGCACAGATGCGTAAGGAGAAAATACCGCATCAGGCGCCATTCGCCAT  
TCAGGCTGCGCAACTGTTGGGAAGGGCGATCGGTGCGGGCCTCTTCGCTA  
TTACGCCAGCTGGCGAAAGGGGGATGTGCTGCAAGGCGATTAAGTTGGGT  
AACGCCAGGGTTTTCCAGTCACGACGTTGTAACGACGGCCAGTGAAT  
TCGAGCTCGGTACCTCGCGAATGCATCTAGATATCGGATCCCGACGCTAA  
TGACCCTGTGGGTTTTACACTTAAAAACACAGTCTGTACCGTCTGCGGTAT  
GTGGAAAGGTTATGGCTGTAGTTGTGATCAACTCCGCGAACCCATGCTTC  
AGTCAGCTGATGCACAATCGTTTTTAAACGGGTTTGCGGCAGCAGTAGGG  
GAACTTCTCCTGCTAGAATGGCTGGCAATGGCGGTGATGCTGCTCTTGCTT  
TGCTGCTGCTTGACAGATTGAACCAGCTTGAGAGCAAAATGTCTGGTAAA

GGCCAACAACGACGGGCCCCTCGACTGCAGAGGCCTGCATGCAAGCTTGG  
CGTAATCATGGTCATAGCTGTTTCCTGTGTGAAATTGTTATCCGCTCACAA  
TTCCACACAACATACGAGCCGGAAGCATAAAGTGTAAGCCTGGGGTGCC  
TAATGAGTGAGCTAACTCACATTAATTGCGTTGCGCTCACTGCCCGCTTTC  
CAGTCGGGAAACCTGTCGTGCCAGCTGCATTAATGAATCGGCCAACGCGC  
GGGGAGAGGCGGTTTTCGTATTGGGCGCTCTTCCGCTTCCCTCGCTCACTGA  
CTCGCTGCGCTCGGTCGTTTCGGCTGCGGCGAGCGGTATCAGCTCACTCAA  
AGGCGGTAATACGGTTATCCACAGAATCAGGGGATAACGCAGGAAAGAA  
CATGTGAGCAAAAGGCCAGCAAAAGGCCAGGAACCGTAAAAGGCCGCG  
TTGCTGGCGTTTTTCCATAGGCTCCGCCCCCTGACGAGCATCACAAAAT  
CGACGCTCAAGTCAGAGGTGGCGAAACCCGACAGGACTATAAAGATAACC  
AGGCGTTTTCCCCTGGAAGCTCCCTCGTGCGCTCTCCTGTTCCGACCCTGC  
CGCTTACCGGATACCTGTCCGCTTTTCTCCCTTCGGGAAGCGTGGCGCTTT  
CTCATAGCTCACGCTGTAGGTATCTCAGTTCGGTGTAGGTCGTTTCGCTCCA  
AGCTGGGCTGTGTGCACGAACCCCCGTTTCAGCCCGACCGCTGCGCCTTA  
TCCGGTAACTATCGTCTTGAGTCCAACCCGGTAAGACACGACTTATCGCC  
ACTGGCAGCAGCCACTGGTAACAGGATTAGCAGAGCGAGGTATGTAGGC  
GGTGCTACAGAGTTCTTGAAGTGGTGGCCTAACTACGGCTACACTAGAAG  
AACAGTATTTGGTATCTGCGCTCTGCTGAAGCCAGTTACCTTCGGAAAAA  
GAGTTGGTAGCTCTTGATCCGGCAAACAAACCACCGCTGGTAGCGGTGGT  
TTTTTTGTTTGCAAGCAGCAGATTACGCGCAGAAAAAAAGGATCTCAAGA  
AGATCCTTTGATCTTTTCTACGGGGTCTGACGCTCAGTGGAACGAAAACCTC  
ACGTTAAGGGATTTTGGTCATGAGATTATCAAAAAGGATCTTACCTAGA  
TCCTTTTAAATTA AAAATGAAGTTTTAAATCAATCTAAAGTATATATGAGT  
AACTTGGTCTGACAGTTACCAATGCTTAATCAGTGAGGCACCTATCTCA  
GCGATCTGTCTATTTTCGTTTCATCCATAGTTGCCTGACTCCCCGTCGTGTAG  
ATAACTACGATACGGGAGGGCTTACCATCTGGCCCCAGTGCTGCAATGAT  
ACCGCGAGACCCACGCTCACCGGCTCCAGATTTATCAGCAATAAACCAGC  
CAGCCGGAAGGGCCGAGCGCAGAAGTGGTCTGCAACTTTATCCGCCTCC  
ATCCAGTCTATTAATTGTTGCCGGGAAGCTAGAGTAAGTAGTTCGCCAGTT  
AATAGTTTGCGCAACGTTGTTGCCATTGCTACAGGCATCGTGGTGTACAGC  
TCGTCGTTTGGTATGGCTTCATTCAGCTCCGGTCCCAACGATCAAGGCGA  
GTTACATGATCCCCATGTTGTGCAAAAAAGCGGTTAGCTCCTTCGGTCCT  
CCGATCGTTGTCAGAAGTAAGTTGGCCGCAAGTGTATCACTCATGGTTATG  
GCAGCACTGCATAATTCTCTTACTGTCATGCCATCCGTAAGATGCTTTTTCT  
GTGACTGGTGAGTACTCAACCAAGTCATTCTGAGAATAGTGTATGCGGCG  
ACCGAGTTGCTCTTGCCCGGCGTCAATACGGGATAAATACCGCGCCACATA  
GCAGAACTTTAAAAGTGCTCATCATTGGAAAACGTTCTTCGGGGCGAAAA  
CTCTCAAGGATCTTACCGCTGTTGAGATCCAGTTCGATGTAACCCACTCGT

GCACCCAACCTGATCTTCAGCATCTTTACTTTCCACCAGCGTTTCTGGGTGA  
GCAAAAACAGGAAGGCAAAATGCCGCAAAAAGGGAATAAGGGCGACA  
CGGAAATGTTGAATACTCATACTCTTCCTTTTTCAATATTATTGAAGCATT  
ATCAGGGTTATTGTCTCATGAGCGGATACATATTTGAATGTATTTAGAAAA  
ATAAACAAATAGGGGTTCCGCGCACATTTCCCGAAAAGTGCCACCTGAC  
GTCTAAGAAACCATTATTATCATGACATTAACCTATAAAAATAGGCGTAT  
CACGAGGCCCTTTCGTC

**Positive plasmid sequences for E gene** (Color font representation amplification products)

GCGCGTTTCGGTGATGACGGTGAAAACCTCTGACACATGCAGCTCCCGGA  
GACTGTCACAGCTTGTCTGTAAGCGGATGCCGGGAGCAGACAAGCCCGTC  
AGGGCGCGTCAGCGGGTGTGGCGGGTGTCCGGGGCTGGCTTAATTATGCG  
GCATCAGAGCAGATGGTAGACAGAGTGCACCAGATGCGGTGAGAAATAC  
CGCACAGATGCGTAAGGAGAAAATACCGCATCAGGCGCCATTCGCCATTC  
AGGCTGCGCAGCTGTTGGGAAGGGCGGTGCGGTGCGGGCCTCTTCGCTATT  
ACGCCAGCTGGCGAAAGGCGGATGTGCTGCCAGGCGATTCAGTTGGGTAA  
CGCCAGGGTTTTCCAGTCACGACGTTGCAGAACGACGGCCAGAGAGTTA  
GAGGACGGAACCTCGCGAATACAACGAGATATCGGGTCCCACACACAGG  
TACGTTAATAGTTAATAGCGTACTTCTTTTTCTTGCTTTCGTGGTATTCTTG  
CTAGTTACACTAGCCATCCTTACTGCGCTTCGATTGTGTGCGTACTGCTGC  
AATATGACACGGGCACGACGAGAACACAGGCCTGCGTGCAGAGATGGCG  
TAATCATGGTCATAGCTGTTTCTGTGTGAAATTGTTATCCGCTCACAATT  
CCACACAACATACGAGCCGGAAGCATAAAGTGTAAGCCTGGGGTGCCT  
AATGAGTGAGCTAACTCACATTAATTGCGTTGCGCTCACTGCCCCGCTTTC  
AGTCGGGAAACCTGTCGTGCCAGCTGCATTAATGAATCGGCCAACGCGCG  
GGGAGAGGCGGTTTTCGTATTGGGCGCTCTTCCGCTTCCTCGCTCACTGAC  
TCGCTGCGCTCGGTCGTTTCGGCTGCGGCGAGCGGTATCAGCTCACTCAA  
GGCGGTAATACGGTTATCCACAGAATCAGGGGATAACGCAGGAAAGAAC  
ATGTGAGCAAAAGGCCAGCAAAAGGCCAGGAACCGTAAAAAGGCCGCGT  
TGCTGGCGTTTTTCCATAGGCTCCGCCCCCTGACGAGCATCACAAAATC  
GACGCTCAAGTCAGAGGTGGCGAAACCCGACAGGACTATAAAGATACCA  
GGCGTTTTCCCCTGGAAGCTCCCTCGTGCGCTCTCCTGTTCCGACCCTGCC  
GCTTACCGGATACCTGTCCGCCTTCTCCCTTCGGGAAGCGTGCGCTTTC  
TCATAGCTCACGCTGTAGGTATCTCAGTTCGGTGTAAGTCGTTTCGCTCAA  
GCTGGGCTGTGTGCACGAACCCCCGTTTCAGCCCGACCGCTGCGCCTTATC  
CGGTAACCTATCGTCTTGAGTCCAACCCGGTAAGACACGACTTATCGCCAC

TGGCAGCAGCCACTGGTAACAGGATTAGCAGAGCGAGGTATGTAGGCGG  
TGCTACAGAGTTCTTGAAGTGGTGGCCTAACTACGGCTACACTAGAAGAA  
CAGTATTTGGTATCTGCGCTCTGCTGAAGCCAGTTACCTTCGGAAAAAGA  
GTTGGTAGCTCTTGATCCGGCAAACAAACCACCGCTGGTAGCGGTGGTTT  
TTTTGTTTGCAAGCAGCAGATTACGCGCAGAAAAAAGGATCTCAAGAAG  
ATCCTTTGATCTTTTCTACGGGGTCTGACGCTCAGTGGAACGAAAACCTCAC  
GTTAAGGGATTTTGGTCATGAGATTATCAAAAAGGATCTTCACCTAGATCC  
TTTTAAATTA AAAATGAAGTTTTAAATCAATCTAAAGTATATATGAGTAAA  
CTTGGTCTGACAGTTACCAATGCTTAATCAGTGAGGCACCTATCTCAGCGA  
TCTGTCTATTTTCGTTTCATCCATAGTTGCCTGACTCCCCGTCGTGTAGATAA  
CTACGATACGGGAGGGCTTACCATCTGGCCCCAGTGCTGCAATGATACCG  
CGAGACCCACGCTCACCGGCTCCAGATTTATCAGCAATAAACCAGCCAGC  
CGGAAGGGCCGAGCGCAGAAGTGGTCCTGCAACTTTATCCGCCTCCATCC  
AGTCTATTAATTGTTGCCGGGAAGCTAGAGTAAGTAGTTCGCCAGTTAAT  
AGTTTGCGCAACGTTGTTGCCATTGCTACAGGCATCGTGGTGTACGCTCG  
TCGTTTGGTATGGCTTCATTCAGCTCCGGTTCCCAACGATCAAGGCGAGTT  
ACATGATCCCCCATGTTGTGCAAAAAAGCGGTTAGCTCCTTCGGTCCTCCG  
ATCGTTGTCAGAAGTAAGTTGGCCGCAGTGTTATCACTCATGGTTATGGCA  
GCACTGCATAATTCTTACTGTTCATGCCATCCGTAAGATGCTTTTCTGTG  
ACTGGTGAGTACTCAACCAAGTCATTCTGAGAATAGTGTATGCGGCGACC  
GAGTTGCTCTTGCCCGGCGTCAATACGGGATAAATACCGCGCCACATAGCA  
GAACTTTAAAAGTGCTCATCATTGGAAAACGTTCTTCGGGGCGAAAACCTC  
TCAAGGATCTTACCGCTGTTGAGATCCAGTTCGATGTAACCCACTCGTGCA  
CCCAACTGATCTTCAGCATCTTTTACTTTTACCAGCGTTTCTGGGTGAGCA  
AAAACAGGAAGGCAAAAATGCCGCAAAAAAGGGAATAAGGGGCGACACGG  
AAATGTTGAATACTCATACTCTTCCTTTTTCAATATTATTGAAGCATTTATC  
AGGGTTATTGTCTCATGAGCGGATACATATTTGAATGTATTTAGAAAAATA  
AACAAATAGGGGTTCGCGCACATTTCCCGAAAAGTGCCACCTGACGTC  
TAAGAAACCATTATTATCATGACATTAACCTATAAAAATAGGCGTATCAC  
GAGGCCCTTT
